# Supplementary material
Source: publisher figshare collection journal article supplement (https://karger.figshare.com/ndownloader/files/18165548)
Supplement: Supplementary file 1 [file 18165548]

**Supplement**

**Supplementary Table 1.** Definition of cardiovascular disease for stratification purposes

| Coronary artery disease |
| --- |
| - Previous myocardial infarction |
| - History of coronary revascularization (percutaneous coronary intervention or coronary artery bypass graft) |
| - Angiographically proven stenosis ≥50% in at least one major epicardial coronary artery |
| Cerebrovascular disease |
| - Previous ischemic stroke (transient ischemic attack alone not sufficient to fulfill this criterion) |
| Peripheral arterial disease |
| - Previous non-traumatic leg amputation |
| - History of lower-limb revascularization (either surgical or percutaneous) |
| - History of intermittent claudication with ankle brachial pressure index of ≤0.80 in at least one side |

**Supplementary Table 2.** Baseline characteristics (continued)

|  | Total (*N*=7354) |
| --- | --- |
| Ethnicity, *n* (%) |  |
| Hispanic | 1224 (16.6) |
| Non-Hispanic | 6103 (83.0) |
| Waist-to-hip ratio (SD) | 1.0 (0.1) |
| Smoking status, *n* (%) |  |
| Never smoked | 3448 (46.9) |
| Ex-smoker | 2621 (35.6) |
| Current smoker | 1285 (17.5) |
| Mean albumin (SD), g/dL | 4.3 (0.3) |
| Mean hemoglobin (SD), g/dL | 13.6 (1.7) |
| Erythropoietin-stimulating agents, *n* (%) | 19 (0.3) |
| Potassium supplements, *n* (%) | 213 (2.9) |
| Potassium-lowering agents, *n* (%) | 46 (0.6) |
| Atrial fibrillation/atrial flutter, *n* (%) | 607 (8.3) |
| Sleep apnea syndrome, *n* (%) | 588 (8.0) |
| Periodontal disease, *n* (%) | 363 (4.9) |

SD, standard deviation.
